# Supplementary material
Source: publisher site journal article supplement (https://www.dovepress.com/article/576790)
Supplement: Supplementary file 1 [file 576790_Figure%201%20Supporting%20Information.pdf]

## **INTERVIEW GUIDE FOR DENTAL CLINICIANS AND DENTAL TECHNOLOGISTS**

### **POST-INSERTION CHALLENGES**

1. Can you share some common challenges that edentulous patients may face during the adaption period with complete dentures?
2. How do you address patients concern such as speech difficulties, sore spots or psychological adjustment during the initial stages of wearing complete dentures?
3. What challenges do patients face while wearing complete dentures? Probe: what causes those challenges? How do you help them to adapt to the denture?
4. What challenges do you face when treating edentulous patients? (Probe: patient non-compliance, language barrier, medical terminologies).
5. Can you discuss the significance of educating complete denture wearers about proper care and maintenance of their dentures? How does this education impact the long term success of denture therapy?
6. What post-insertion advice do you give patients? (What guidance do you give to patients about proper denture care and maintenance to ensure long term success? What strategies do you use to effectively convey information and ensure patients understanding?)
7. What guidance do you give patients to clean and maintain their dentures?
